# Supplementary material for: Standardization of definitions in focal therapy of prostate cancer: report from a Delphi consensus project
Source: Springer Nature journal article supplement (doi:10.1007/s00345-016-1782-x), 2016-02-18
Supplement: MOESM1 [file 8334566]

## Addendum 1. All registered participants to the online rounds.

Not all participants were registered as some responded anonymously.

| Name                  | Country         | Name                  | Country         |
|-----------------------|-----------------|-----------------------|-----------------|
| Andre de Castro Abreu | USA             | Badrinath Konety      | USA             |
| Hashim Ahmed          | UK              | Györge Kovács         | Germany         |
| Gerald Andriole       | USA             | Pilar Laguna Pes      | The Netherlands |
| Eduard Baco           | Norway          | Massimo Lazzeri       | Italy           |
| Duke Bahn             | USA             | Raymond Leiveillee    | USA             |
| Chris Bangma          | The Netherlands | Yoh Matsuoka          | Japan           |
| Eric Barret           | France          | Roberto Miano         | Italy           |
| Daniel Baumunk        | Germany         | Caroline Moore        | UK              |
| Andreas Blana         | Germany         | Rodolfo Montironi     | Italy           |
| Alberto Bossi         | France          | Jeroen van Moorselaar | The Netherlands |
| Simon Bott            | UK              | Satoru Muto           | Japan           |
| Maurizio Brausi       | Italy           | Sacha Pahernik        | Germany         |
| Jeffrey Cadeddu       | USA             | Bradley Pieters       | The Netherlands |
| Xavier Cathelineau    | France          | Thomas Polascik       | USA             |
| Jonathan Coleman      | USA             | Ardeshir Rastinehad   | USA             |
| Sebastien Crouzet     | France          | Theo de Reijke        | The Netherlands |
| Mihir Desai           | USA             | John Rewcastle        | USA             |
| Jose Dominguez-Escrig | Spain           | Jean de la Rosette    | The Netherlands |
| Vinay Duddalwar       | USA             | Dilara Savci-Heijink  | The Netherlands |
| Scott Eggener         | USA             | Rafael Sanchez-Salas  | France          |
| Behfar Ehdai          | USA             | Georg Salomon         | Germany         |
| Mark Emberton         | UK              | Peter Scardino        | USA             |
| Ferdinand Frauscher   | Austria         | Stephen Scionti       | USA             |
| Jurgen Futterer       | The Netherlands | Ludger Sentker        | Germany         |
| Roman Ganzer          | Germany         | Martin Schostak       | Germany         |
| Sangeet Ghai          | Canada          | Chandru Sundaram      | USA             |
| Paolo Gontero         | Italy           | Joachim Thürhoff      | Germany         |
| Mitchell Gross        | USA             | John Trachtenberg     | Canada          |
| Rajan Gupta           | USA             | Matvey Tsivian        | USA             |
| Boris Hadaschik       | Germany         | Baris Turkbey         | USA             |
| Thomas Olivier Henkel | Germany         | Osamu Ukimura         | USA             |
| Markus Hohenfellner   | Germany         | Massimo Valerio       | Switzerland     |
| Stephen Jones         | USA             | Arnauld Villers       | France          |
| Steven Joniau         | Belgium         | Jochen Walz           | France          |
| Christof Kastner      | UK              | John Ward             | USA             |
| Aaron Katz            | USA             | Hessel Wijkstra       | The Netherlands |
| Laurence Klotz        | Canada          |                       |                 |
